# Supplementary material for: Evaluation of the Heat Shock Protein 90 Inhibitor Ganetespib as a Sensitizer to Hyperthermia-Based Cancer Treatments
Source: MDPI journal article supplement (doi:10.3390/cancers14215250), 2022-10-26
Supplement: s1 [file s1]

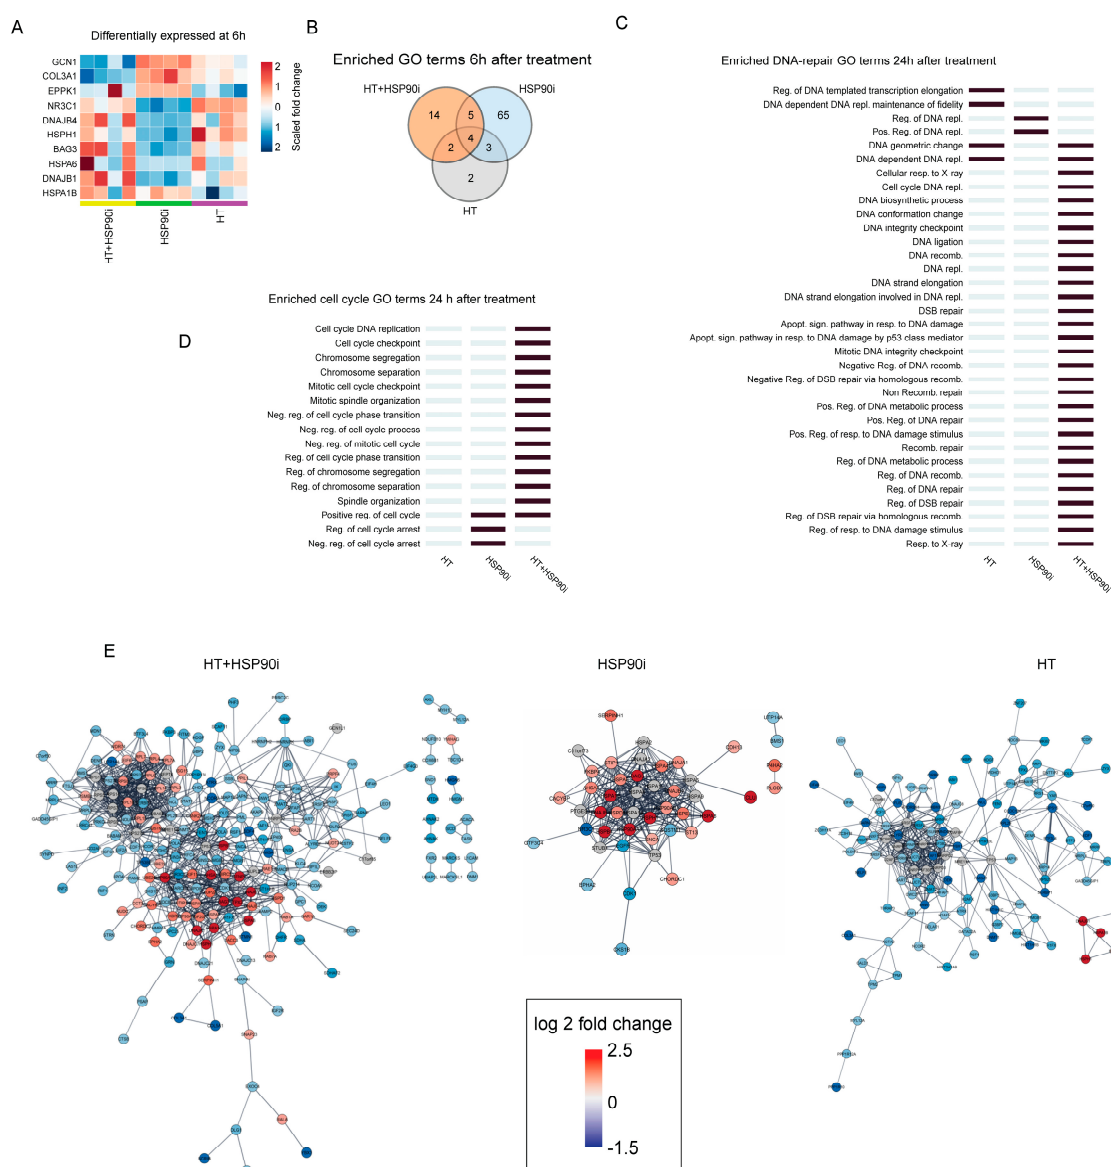

**Figure S1. Proteome alterations caused by ganetespib and hyperthermia.** (A) Heatmap of proteins found to be up- or downregulated in at least one condition 6 hours after hyperthermia (HT). (B) Venn diagram of gene ontology (GO) terms found to be enriched per condition 6 hours after HT. (C-D) Heatmaps displaying enriched DNA-repair and cell cycle GO terms 24 hours after HT (marked in dark blue). (E) Protein-protein interaction networks of up- and downregulated proteins 24 hours after HT.

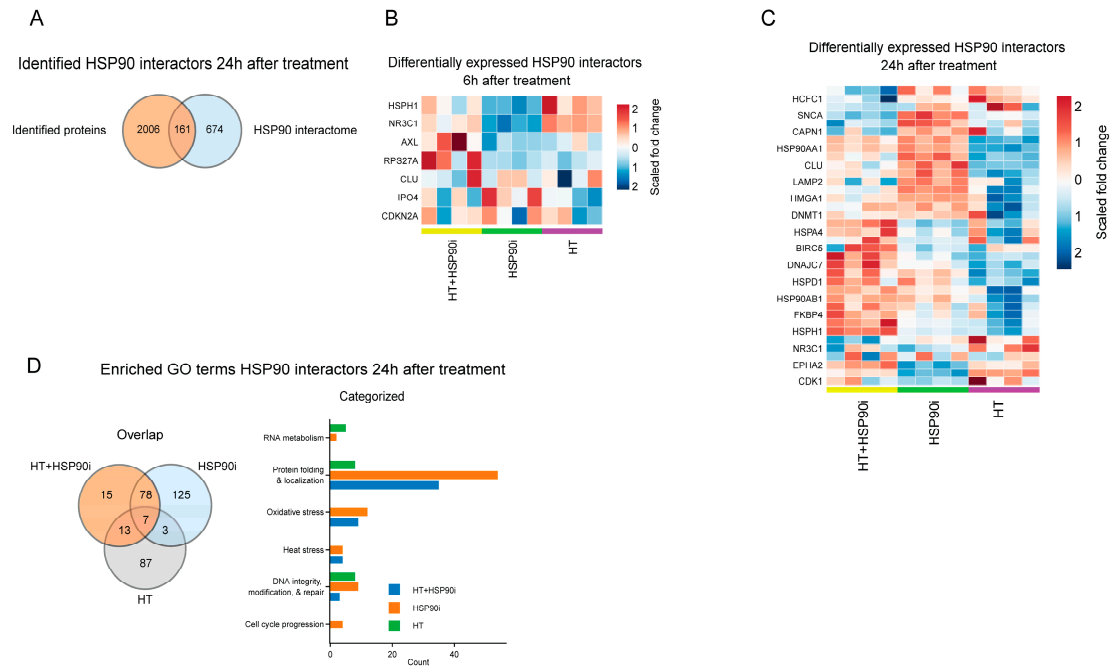

**Figure S2. Proteome alterations caused by ganetespib and hyperthermia.** (A) Venn diagram showing identified HSP90 interactors in the dataset. (B-C) Heatmaps of interactors found to be up- or downregulated in at least one condition at 6 and 24 hours after hyperthermia (HT). (D) Venn diagram and hand-curated categories of gene ontology (GO) terms that were found to be enriched.

HeLa

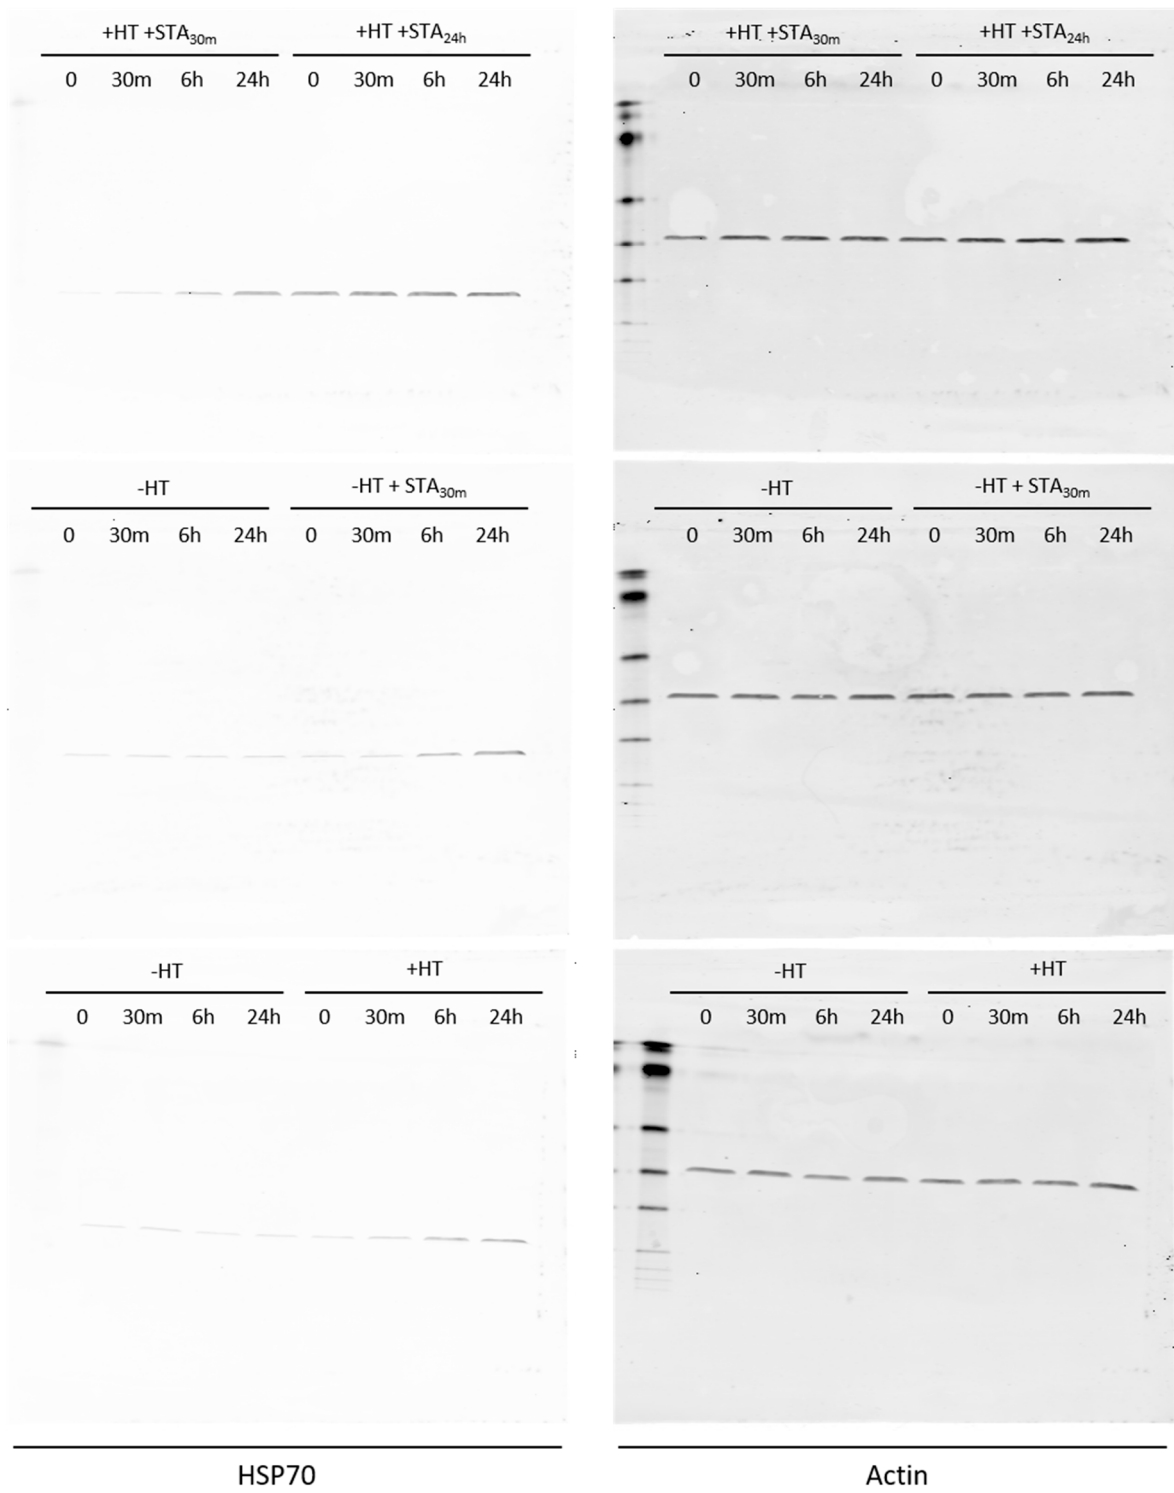

(a)

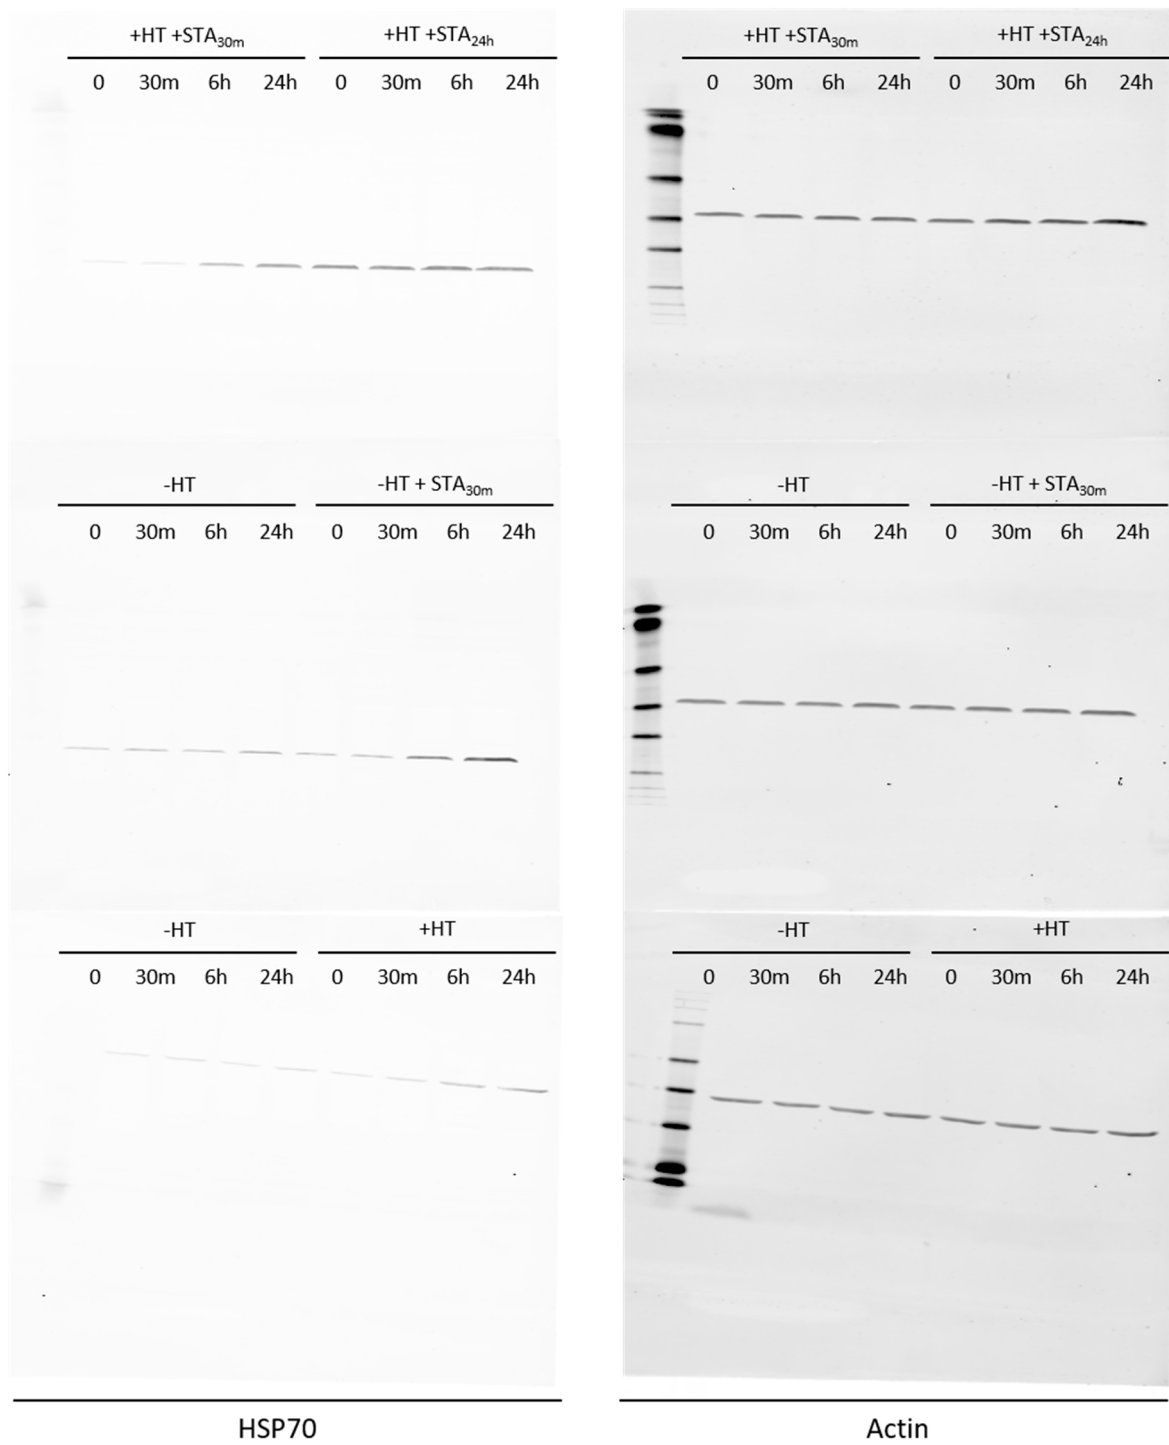

(b)

**Figure S3.** (a) Raw data of HeLa HSP70 actin; (b) Raw data of SiHa HSP70 actin.

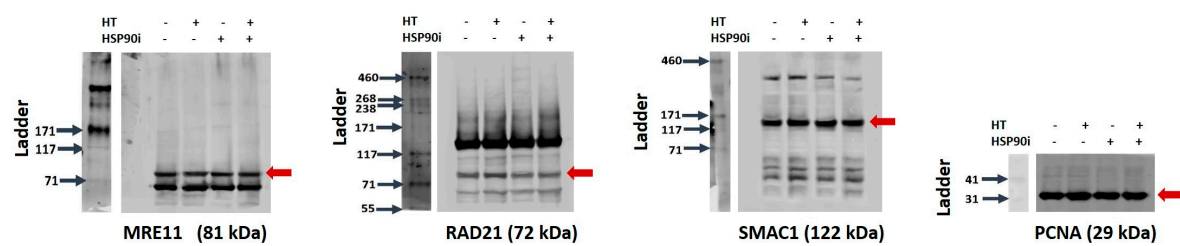

Figure S4. Raw image of annotated Figure 4H.
